# Supplementary material for: Generation of a Zebrafish Knock-In Model Recapitulating Childhood ETV6::RUNX1-Positive B-Cell Precursor Acute Lymphoblastic Leukemia
Source: MDPI journal article supplement (doi:10.3390/cancers15245821), 2023-12-13
Supplement: s1 [file s1]

## Supplementary Materials

### *Method S1. Detailed description of the generation of the donor plasmid*

The *pGTag-TagRFP-B-actin* vector (Addgene #117808) was opened using the *XbaI* and *EcoRI* restriction enzymes. Next, annealed oligos were integrated to remove the *XbaI* restriction site, which could have hindered subsequent vector assembly. Subsequently, the insert *TagRFP-B-actin-terminator* was excised from the vector through the utilization of *BamHI* and *NcoI* restriction enzymes. Annealed oligos (*ClaI-NotI-SacII-SpeI-P2A-XbaI-NcoI*) containing essential restriction sites for future vector assembly together with the P2A sequence were ligated into the opened vector. Following this, the vector was cleaved with *XbaI* and *NcoI*, and two PCR fragments harboring either the GAL4-VP16 cDNA or the ocean pout antifreeze gene transcriptional termination and polyadenylation sequence were simultaneously incorporated. The templates for the generation of these PCR fragments were the vectors *PME-Gal4VP16* and *pGBT-RP2-1* (Addgene #31828), respectively [1,2]. Subsequently, a PCR fragment of human *RUNX1* cDNA spanning from exon 2 to exon 8 was ligated into the vector utilizing the *SacII* and *SpeI* restriction enzymes. As a template for the PCR served a plasmid containing the full *RUNX1* cDNA (Origene; #SC123977). Lastly, the carp b-actin intron 1 splice acceptor was amplified by PCR using the *pGBT-RP2-1* plasmid as a template and ligated into the plasmid by using the *SacII* and *XbaI* restriction enzyme sites (*XbaI* site is present in the partial *RUNX1* cDNA) (Table S1 and Figure S1).

### *Method S2. Identification of intron 5 sequences of zebrafish *etv6* in the UAS:GFP line*

The intron 5 sequences of zebrafish *etv6* in the *UAS:GFP* line, which were crucial for donor plasmid assembly, were identified based on a short segment of intron 5 of the *etv6* gene, which is present in a genomic scaffold within the Zv8 zebrafish assembly (Zv8\_NA6723:-5971:16082:-1). This region was amplified by using primers that are directly adjacent to exon 5 in the *etv6* alleles of the *UAS:GFP* line (Table S10). After amplification, we subcloned the pieces into the vector *pME-MCS* and Sanger sequenced the fragments [1]. Sequence 1 was used as the reference for creating both sgRNA and homologous arms (Figure S2).

## References

1. Kwan, K.M.; Fujimoto, E.; Grabher, C.; Mangum, B.D.; Hardy, M.E.; Campbell, D.S.; Parant, J.M.; Yost, H.J.; Kanki, J.P.; Chien, C.-B. The Tol2kit: A Multisite Gateway-Based Construction Kit for Tol2 Transposon Transgenesis Constructs. *Dev Dyn* **2007**, *236*, 3088–3099, doi:10.1002/dvdy.21343.
2. Clark, K.J.; Balciunas, D.; Pogoda, H.-M.; Ding, Y.; Westcot, S.E.; Bedell, V.M.; Greenwood, T.M.; Urban, M.D.; Skuster, K.J.; Petzold, A.M.; et al. In Vivo Protein Trapping Produces a Functional Expression Codex of the Vertebrate Proteome. *Nat Methods* **2011**, *8*, 506–515, doi:10.1038/nmeth.1606.

PAM

ACCTG (4/8)

**GCTCTTC** (1/4)

NNNNNN

NNNNNN

NNNNNN

NNNNNN

NNNNNN

[illegible]

**Figure S1.** Sequence of the donor plasmid. DNA sequence of the donor plasmid with gene-breaking cassette (3440 bp) before the insertions of the 5' and 3' homology arms.

SgRNA target site in intron 5 of *etv6*:

**TGGGCGGGGATTTCCTTCTTTGG**

PAM

Sequence 1:

GTGAGGCTCCACCCACAAGTGGGGCTAGCTTAGCCACTCCCCACCTTCTATATAACTGAAACAGGCCTGATA  
TTAGAAACAATGTGGGCGGGGATTTCCTTCTTTGGGAAGCTGATTGGTTGAATGATGGGGTTAACAAAATGAG  
GGAAGATGGAGAAAAACAGGGCAGAAAAGAGACATTCATGGCCCAACACCAAATGACACGTAGCTTCGCCCTA  
AGTAACTGATGGCCCCGCCCTAAATGACAAATATATCCGCCCTAAATGATGCATAGCTCCTCCTTAAATGACA  
GATAGCCCTGTCTGGTAGATCCATCCTAAGTGACCAATATCTCCGCCCTAATTGACTGATAGATCCACCCTAA

Sequence 2:

GTGAGGCTCCACCCACAAGTGGGGCTAGCTTAGCCACTCCCCACCTTCTATATAACTGAAACAGGCCTAATA  
TTAGAAACAATGTGGGCGGGGATTTCCTTCTTCGGAATCTGATTGGTTGAATGATGGGGTTAACAAAATGAG  
GGAAGATGGAGAAAAACAGGGCAGAAAAGAGACATGCATGGCCCAACACCAAATGACACGTAGCTTCGCCCTA  
AGTAACTGATAGCCCCGCCCTAAATGACAAATATATCCGCCCTAAATGATGCATAGCTCCTCCTTAAATGACA  
GATAGCCCTGTCTGGTAGATCCATCCTAAGTGACCGATATCTCCGCCCTAATTGACTGATAGATCCACCCTAA

**Figure S2.** Sequences of intron 5 of *etv6*. Partial sequences from both *etv6* alleles of the *UAS:GFP* line were determined by Sanger sequencing. SgRNA target site is shown. PAM sequence is underlined.

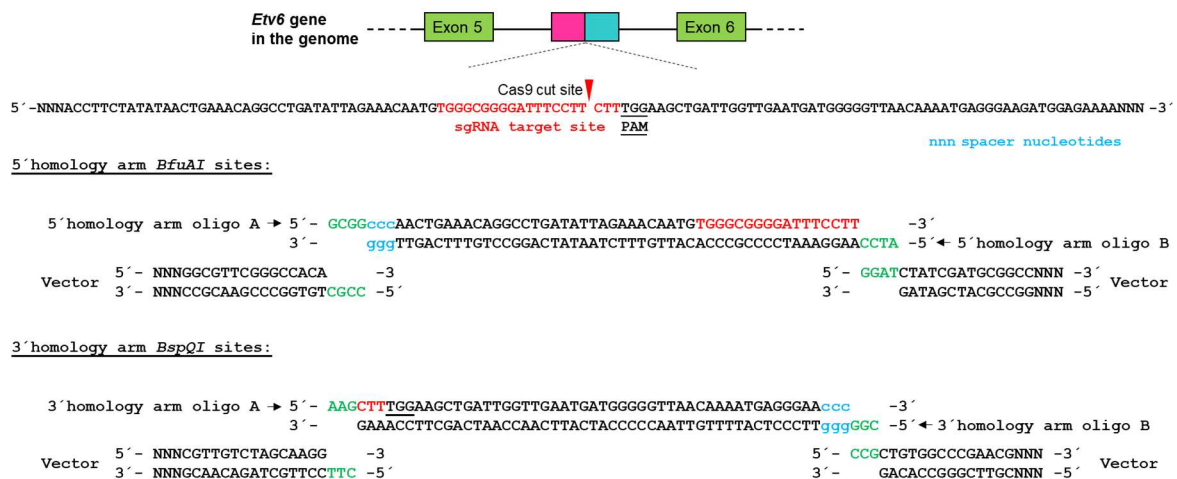

**Figure S3.** Homology arm design. Scheme of CRISPR/Cas9 target site in intron 5 of *etv6*. SgRNA sequence in red and PAM sequence underlined. Annealed 5' and 3' homology arm oligos A and B are shown with overhangs (green) complementary to the overhangs after enzyme digestion in the donor plasmid. Pink and turquoise rectangles: homology arms (48 bp).



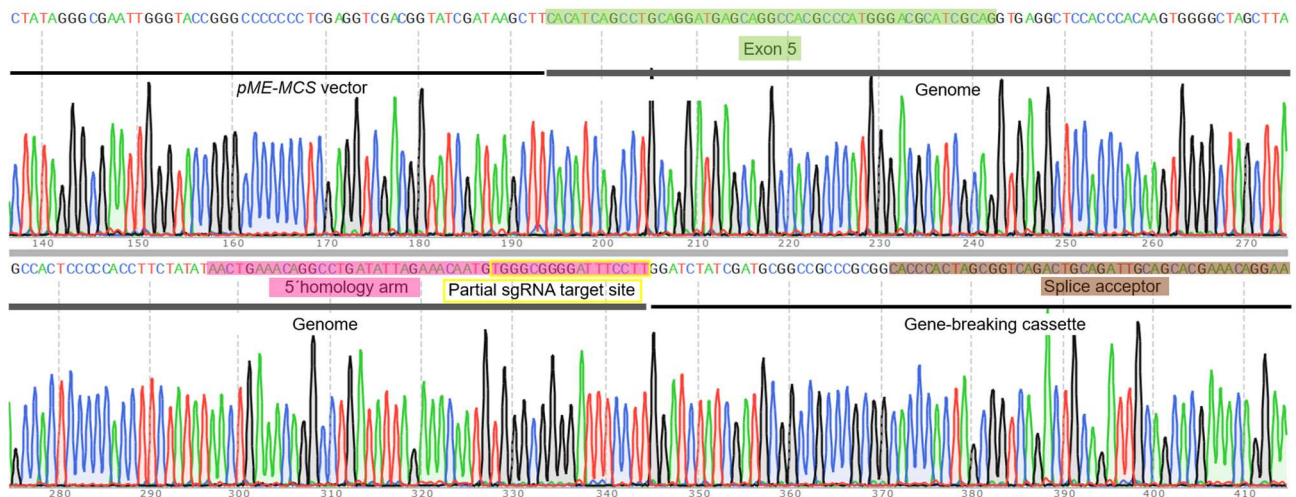

**Figure S4.** Chromatogram of Sanger sequencing of the genomic integration. The Sanger sequencing chromatogram revealed the precise integration of the gene-breaking cassette 5' to the genomic double-strand break in the genome. A fragment of exon 5 of *etv6* (green), the 5' homology arm (pink), portions of the sgRNA target site (yellow frame), and a segment of the splice acceptor (brown) are displayed.

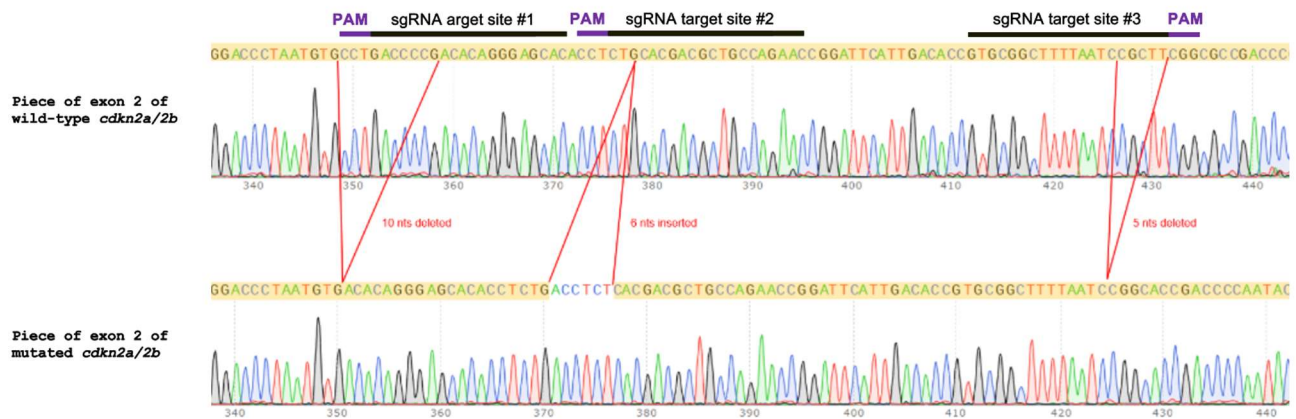

**Figure S5.** Sanger sequencing analysis of exon 2 of the *cdkn2a/b* gene in the *E::R;cdkn2a/b<sup>-/-</sup>* zebrafish line. The wild-type sequence and the mutated sequence are displayed. The three sgRNA target sites and PAM sites are indicated. In mutated exon 2, there are ten nucleotides deleted, six nucleotides inserted, and five nucleotides deleted. This results in a premature stop codon occurring after 210 nucleotides.

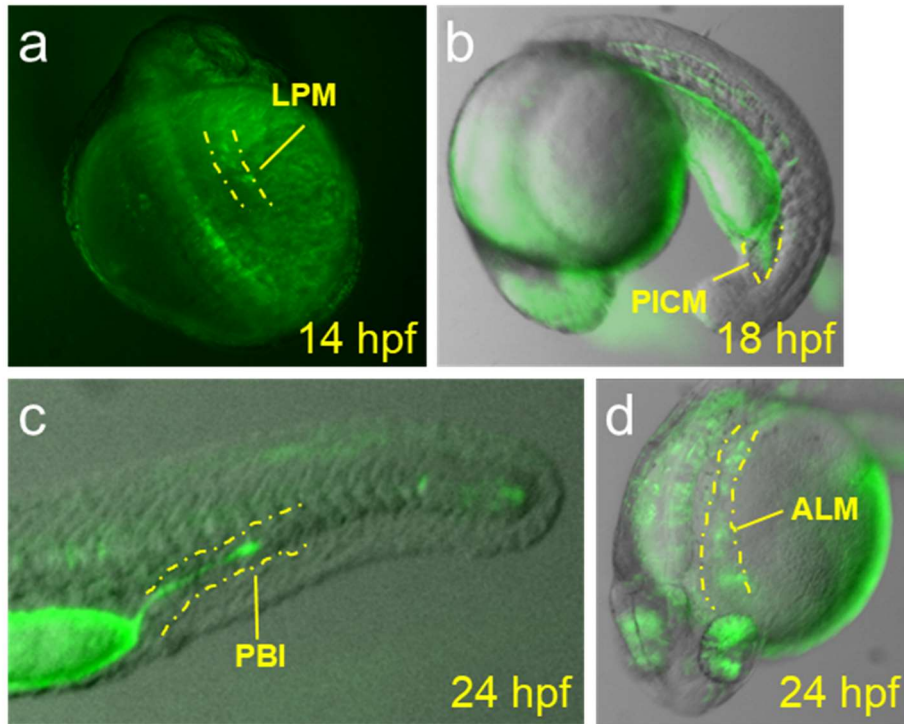

**Figure S6.** GFP Expression in *E::R* knock-in line during primitive hematopoiesis. (a) Dorsal view of the embryo with the anterior at the top. GFP-expressing cells are observed in the lateral plate mesoderm (LPM) at 14 hpf. (b) In a lateral view of the embryo with the anterior to the left, GFP-expressing cells are found in the posterior intermediate cell mass (PICM) at 18 hpf. (c) A close-up view of the caudal region of the embryo (anterior to the left) reveals GFP-expressing cells in the posterior blood island (PBI) at 24 hpf. (d) Dorsal view of the embryo with the anterior at the bottom shows GFP-expressing cells in the anterior lateral plate mesoderm (ALM) at 24 hpf. Hpf: hours post-fertilization.

(a)

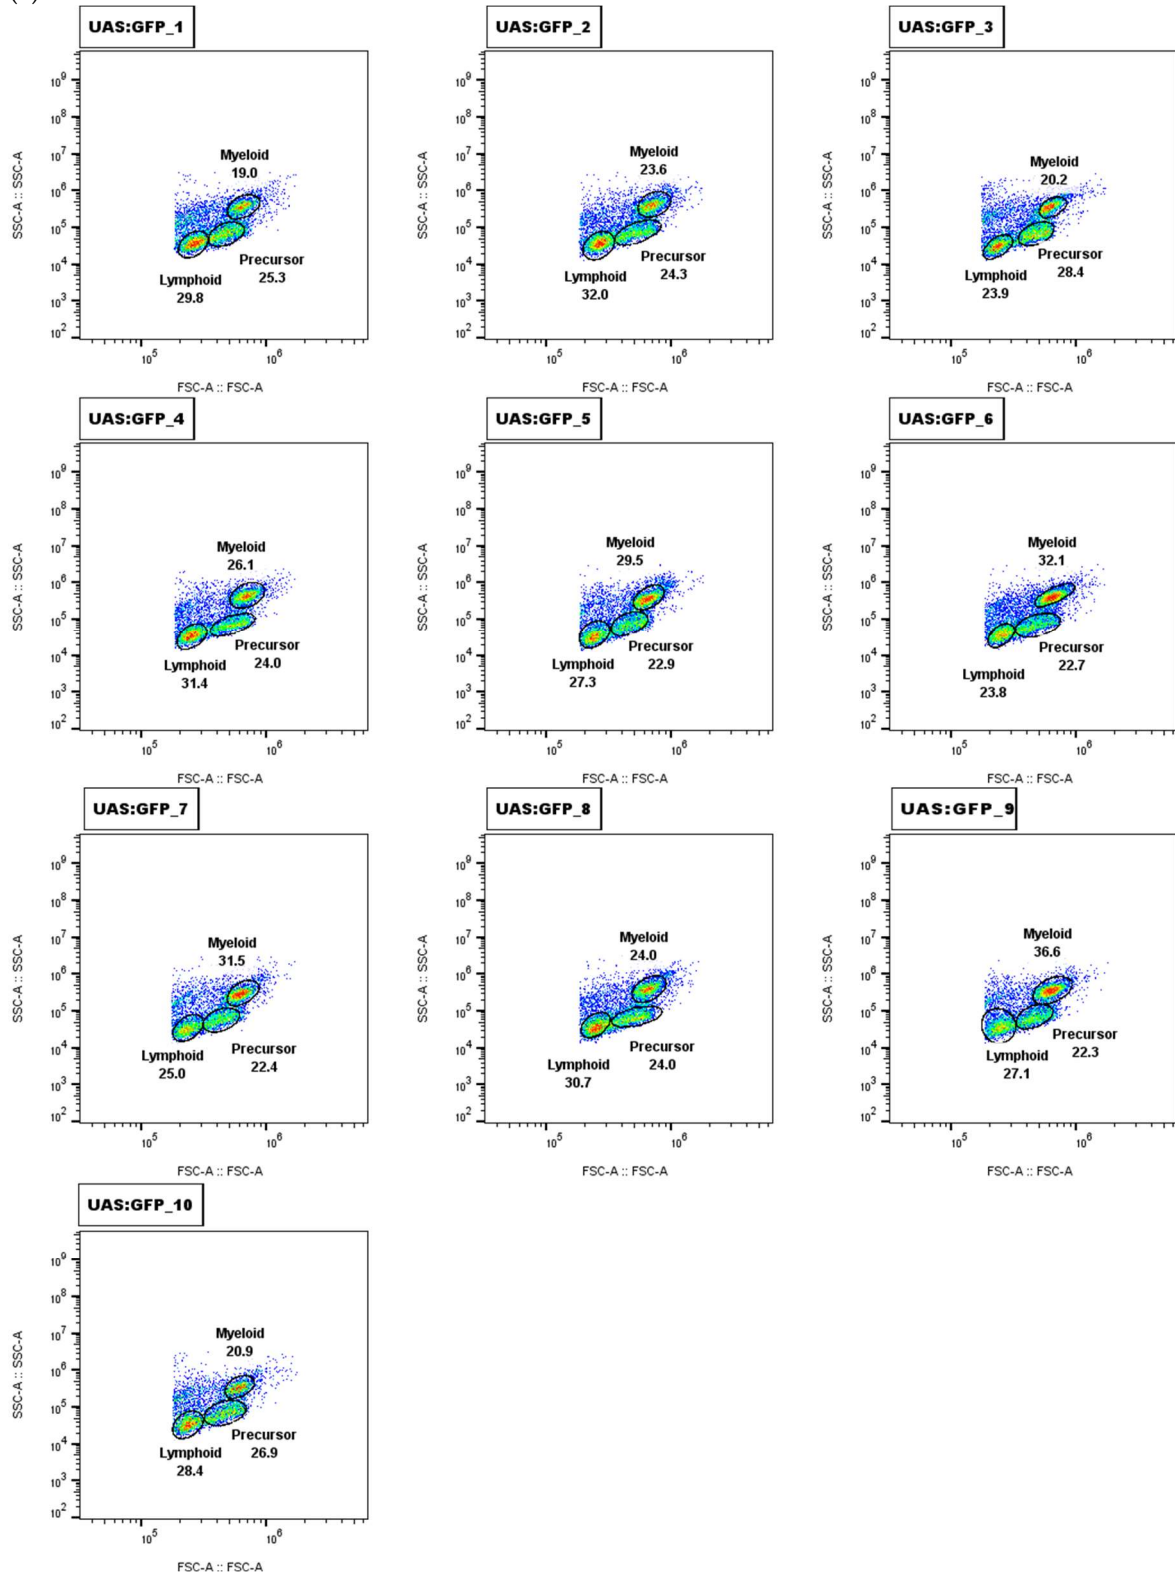

(b)

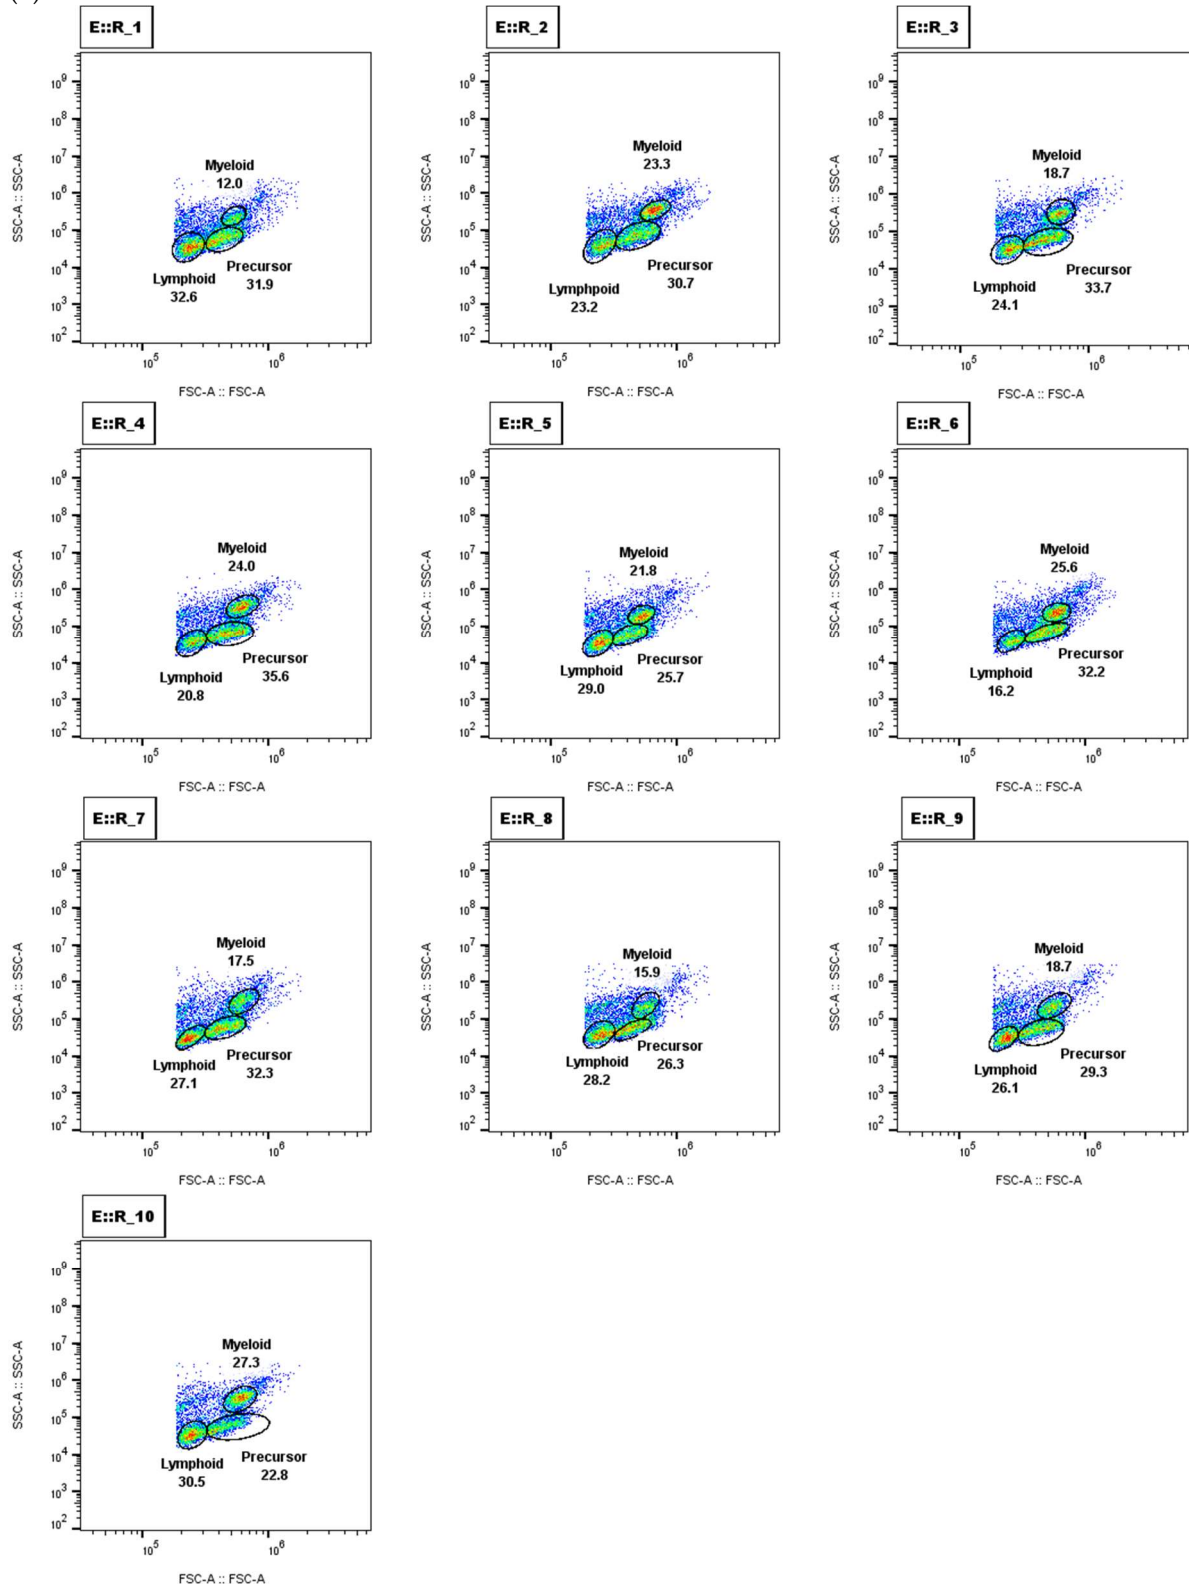

**Figure S7.** Flow cytometry plots. Flow cytometry plots depicting the lymphoid, precursor, and myeloid populations isolated from the whole kidney marrows of ten *UAS:GFP* zebrafish (a) and ten *E::R* zebrafish (b), categorized based on their light scatter characteristics.

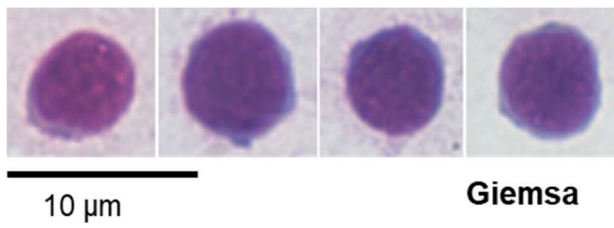

**Figure S8.** Giemsa staining of peripheral blood shows high nuclear-cytoplasmic ratio of the lymphoblasts in the *E::R* knock-in fish.

Figure 3d original blot.

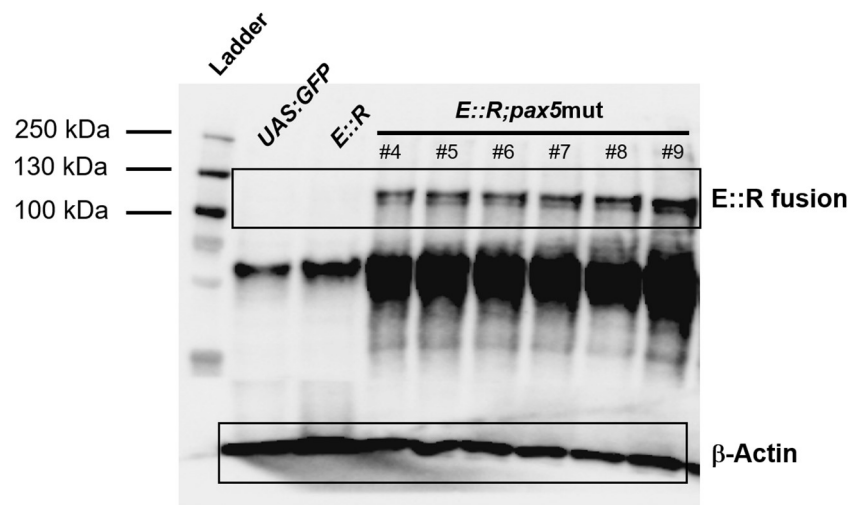

**Figure S9.** Uncropped Western blot of *UAS:GFP*, non-leukemic *E::R* and leukemic *E::R;pax5mut* zebrafish lines by using the human anti-RUNX1 antibody.



Tumor # 1; exon 3 of *pax5* contains either wild-type or an insertion of 2 bases (GC)

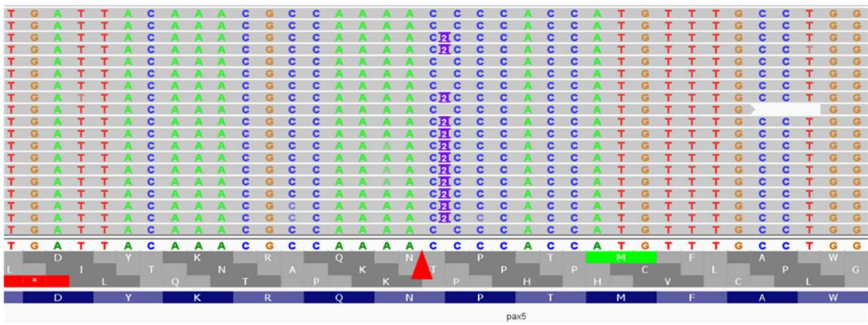

Genomic target of gRNA: 5' **AGGCAACATGGTGGGGTTT** 3' (located on the reverse strand)

PAM: **TGG**

▲ Cutting position

Tumor # 1; exon 5 of *pax5* contains either a deletion (4 bases: GCAG) or an insertion (13 bases: AAACATGGTAGGC)

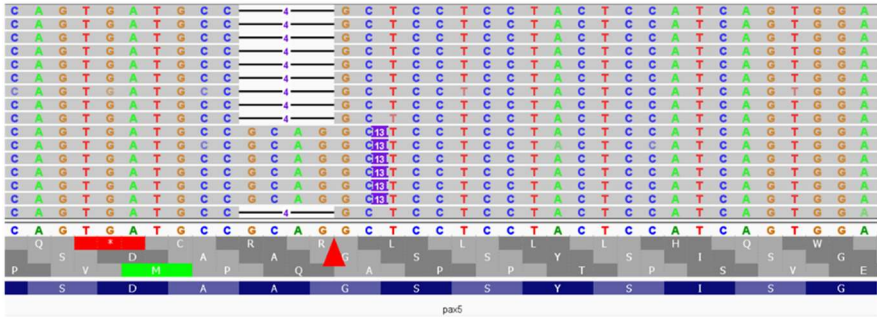

Genomic target of gRNA: 5' **GATGGAGTAGGAGGAGCCT** 3' (located on the reverse strand)

PAM: **CGG**

▲ Cutting position

Tumor # 2; exon 3 of *pax5* contains either a deletion of 6 bases (CCAAAA) or a deletion of 4 bases (CCCC) followed by the exchange of three bases (A->T; C->G; C->A)

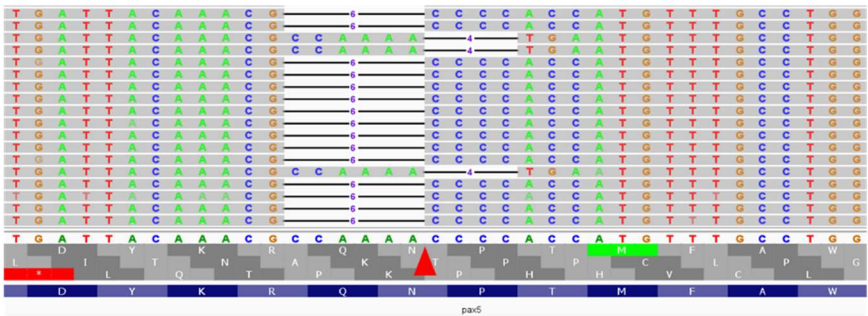

Genomic target of gRNA: 5' **AGGCAACATGGTGGGGTTT** 3' (located on the reverse strand)

PAM: **TGG**

▲ Cutting position

Tumor # 2; exon 5 of *pax5* contains either a deletion (4 bases: GCAG) or an insertion (13 bases: AAACATG)

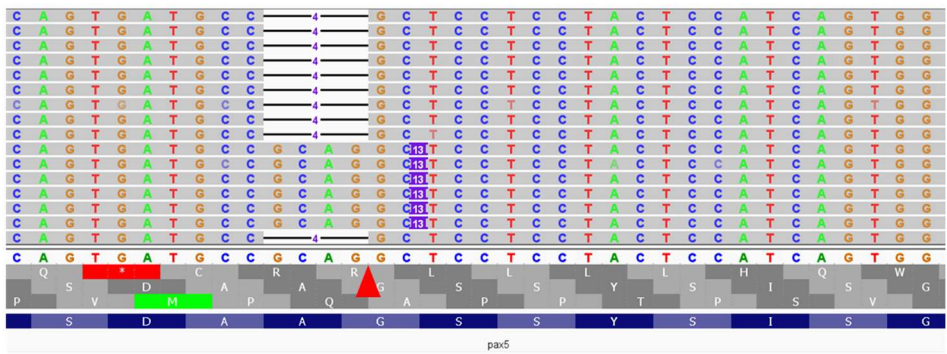

Genomic target of gRNA: 5' **GATGGAGTAGGAGGAGCCT** 3' (located on the reverse strand)

PAM: **CGG**

▲ Cutting position

Tumor # 3; exon 3 of *pax5* contains no mutations

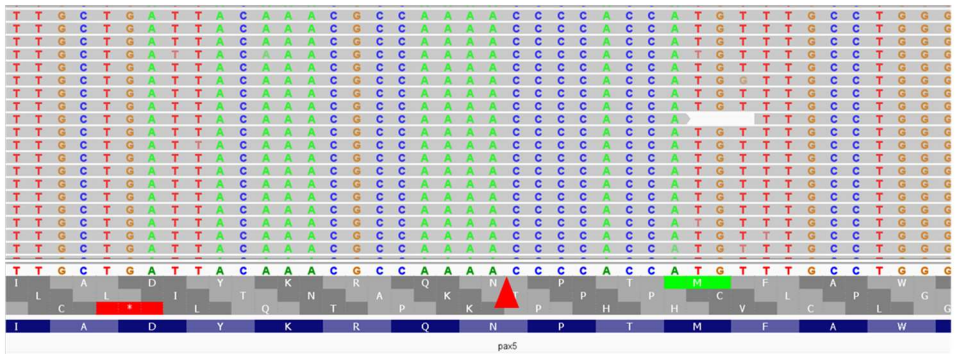

Genomic target of gRNA: 5' **AGGCCAAACATGGTGGGGTTT** 3' (located on the reverse strand)

PAM: **TGG**

▲ Cutting position

Tumor # 3; exon 5 of *pax5* contains either a deletion of 1 or 7 bases

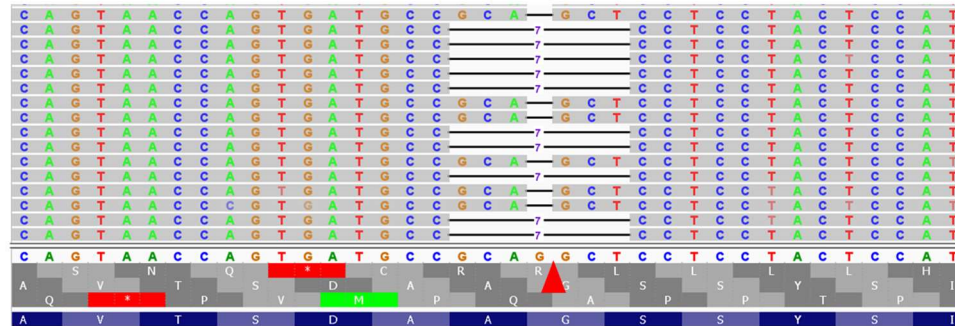

Genomic target of gRNA: 5' **GATGGAGTAGGAGGAGCCT** 3' (located on the reverse strand)

PAM: **CGG**

▲ Cutting position

**Figure S10.** Integrative Genomics Viewer screenshots illustrating mutations in *pax5* exon 3 and exon 5 in *E::R;pax5mut* zebrafish. Tumors #1-#3 are selected as representative examples.

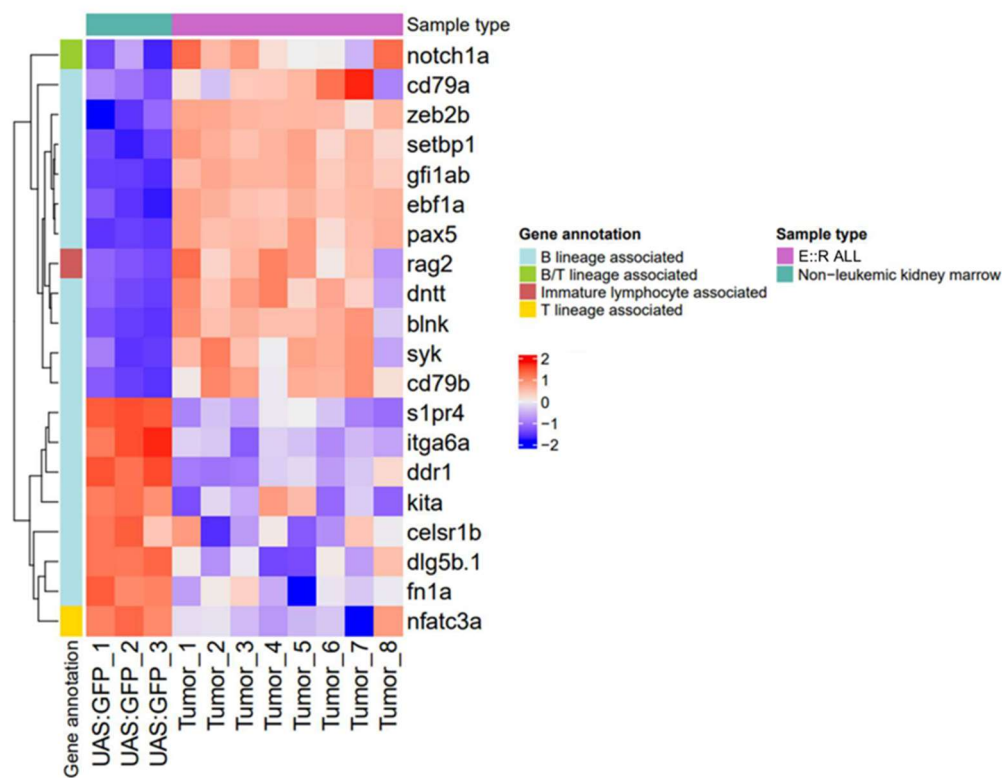

**Figure S11.** Heatmap visualizing the significantly differentially expressed (adjusted p-value  $\leq 0.05$ ) B and T lineage associated genes between the leukemic *E::R;pax5mut* and non-leukemic kidney marrow zebrafish transcriptomes, and their expression across the two groups.

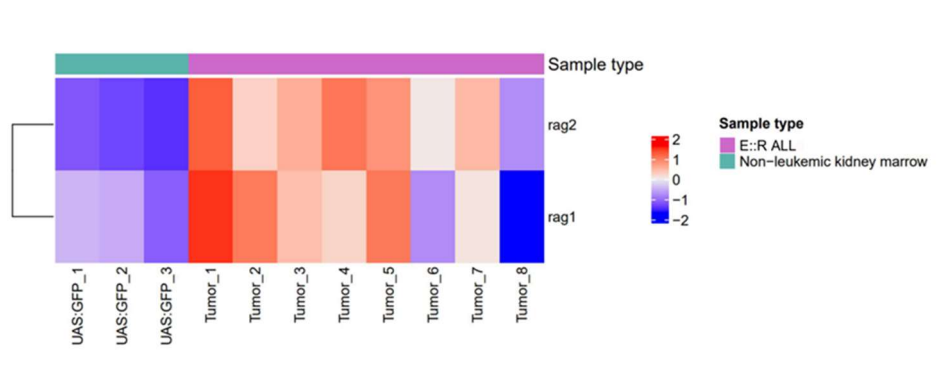

**Figure S12.** Heatmap visualizing the expression of *rag1* and *rag2* genes across the leukemic *E::R;pax5mut* and non-leukemic kidney marrow zebrafish transcriptomes.

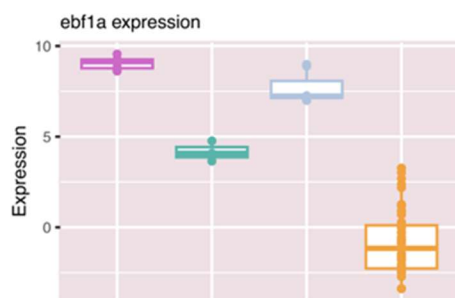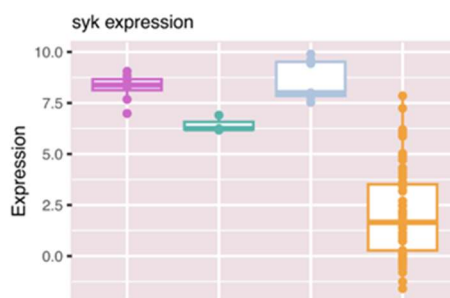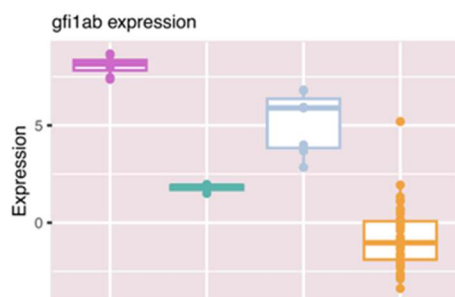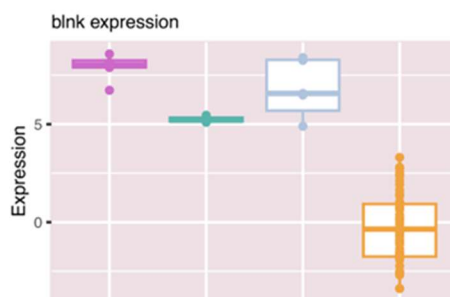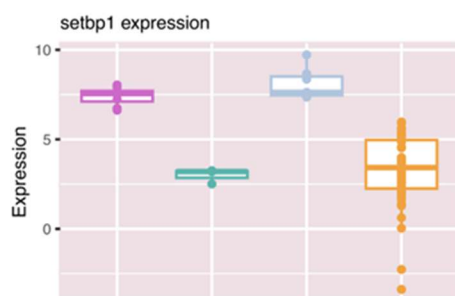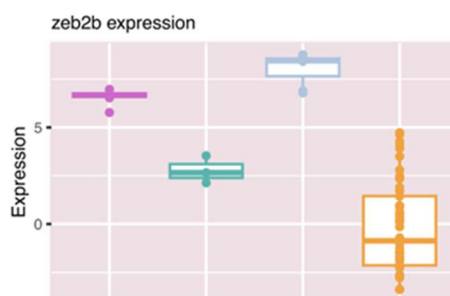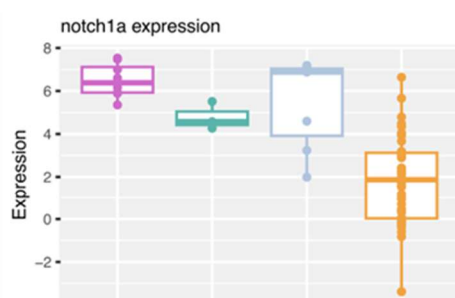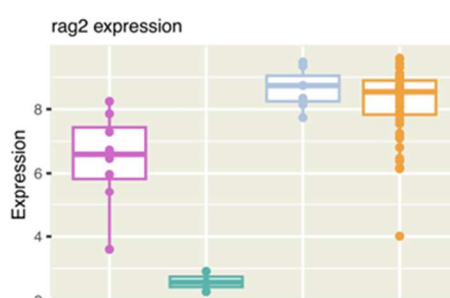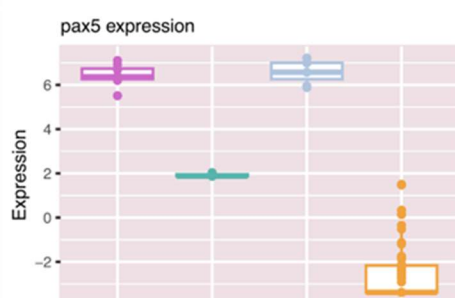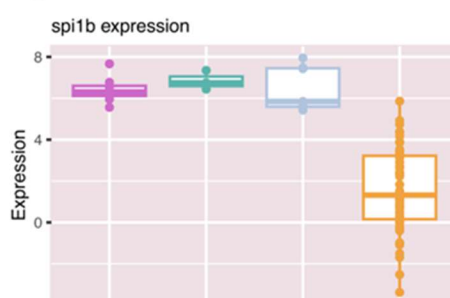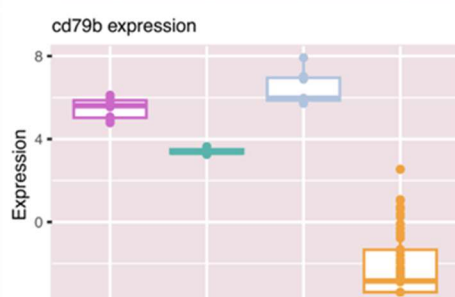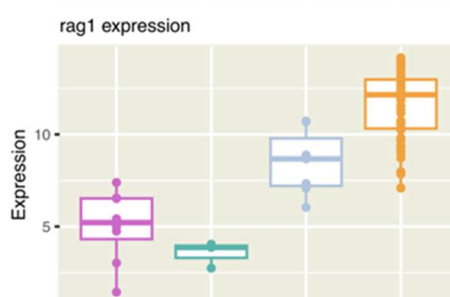



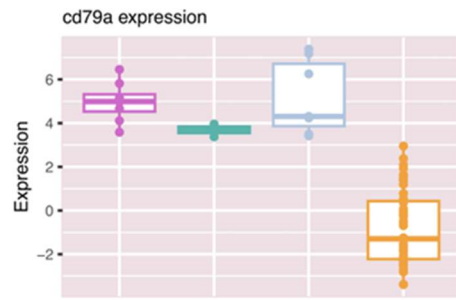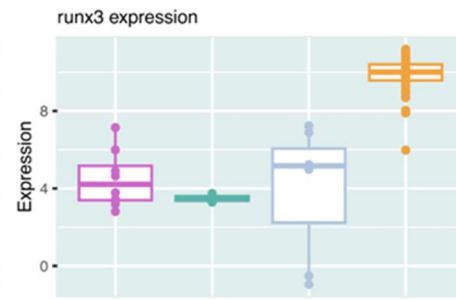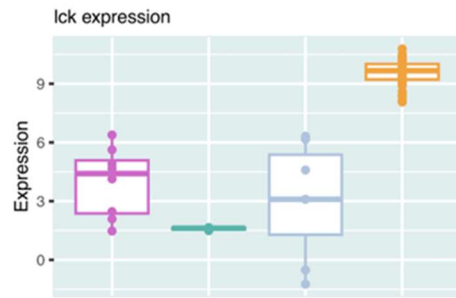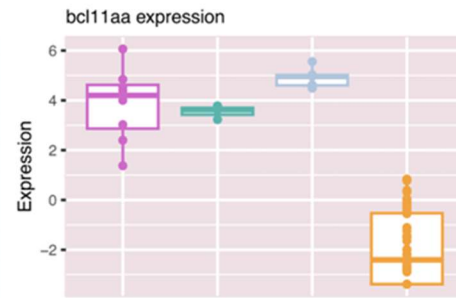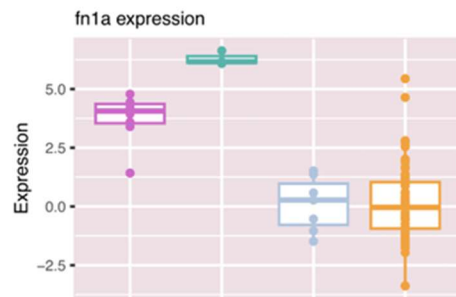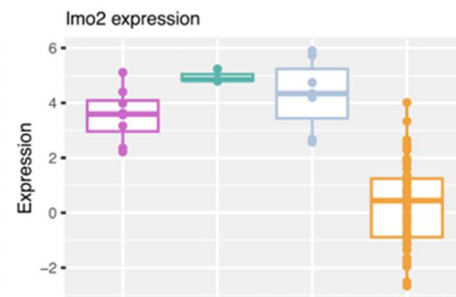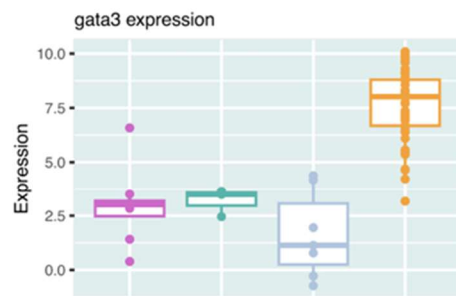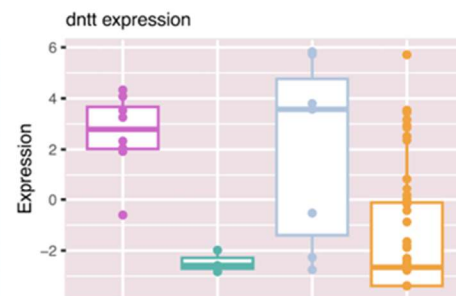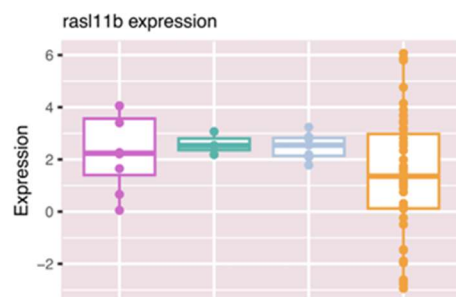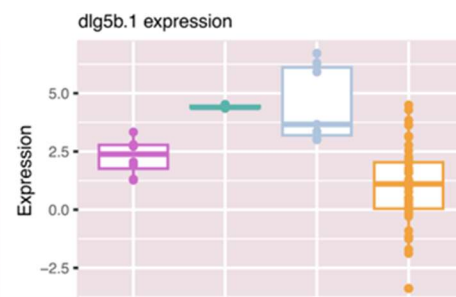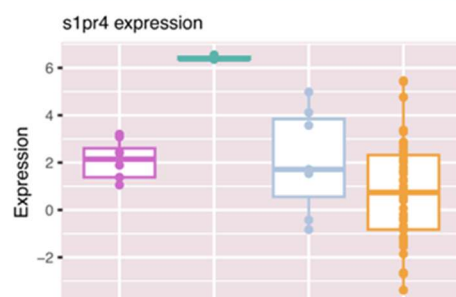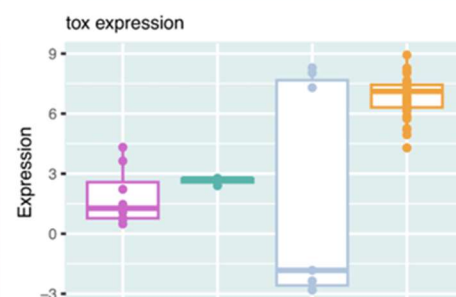

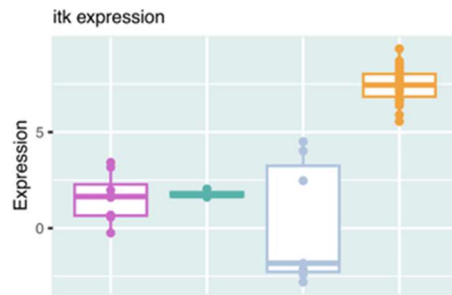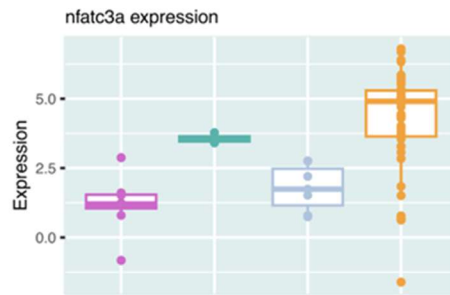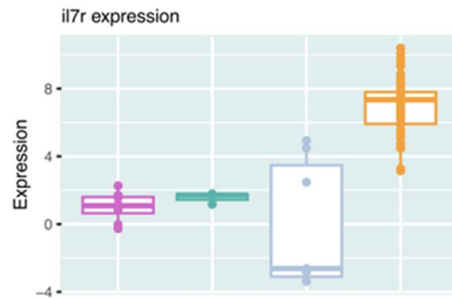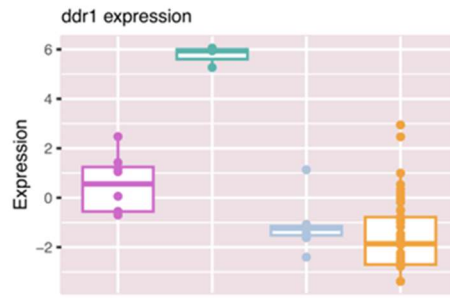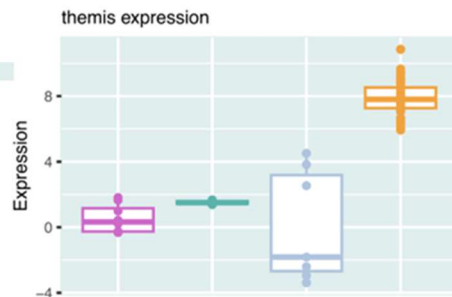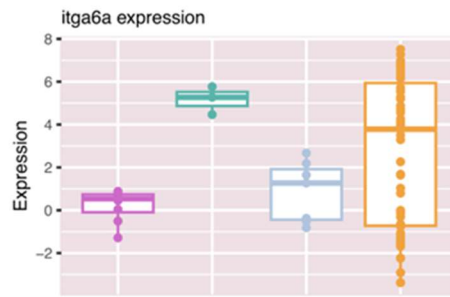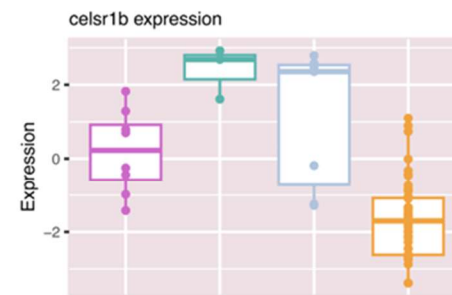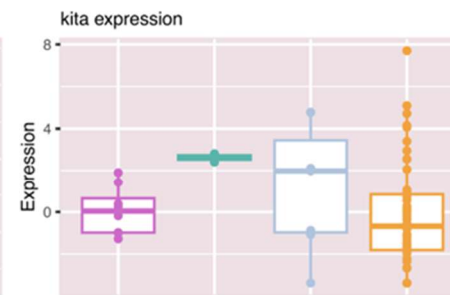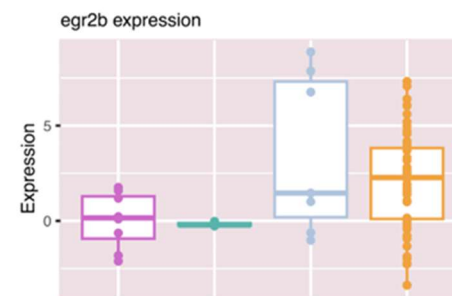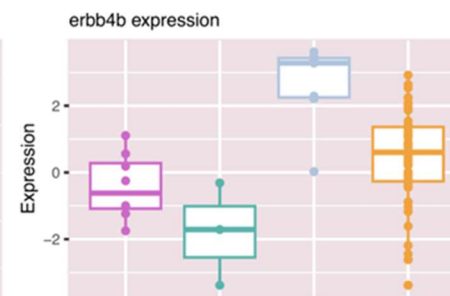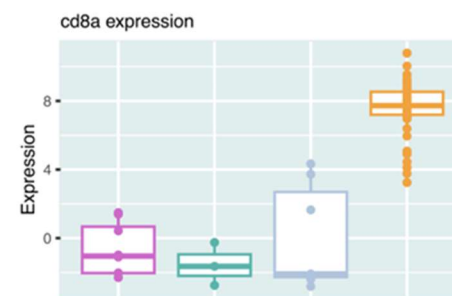

#### Gene annotation

- B lineage associated
- B/T lineage associated
- Immature lymphocyte associated
- T lineage associated

#### Group

- Zebrafish E:R ALL
- Non-leukemic zebrafish kidney marrow
- Zebrafish B-ALL
- Zebrafish T-ALL

**Figure S13.** Boxplots describing the gene expression level of B and T lineage associated genes. between the zebrafish *E::R* ALLs (n=8), non-leukemic kidney marrow (n=3) B-ALLs (n=7), and T-ALLs (n=55). Expression values are log2-transformed counts per million values, and horizontal line corresponds to the median expression level in each group.

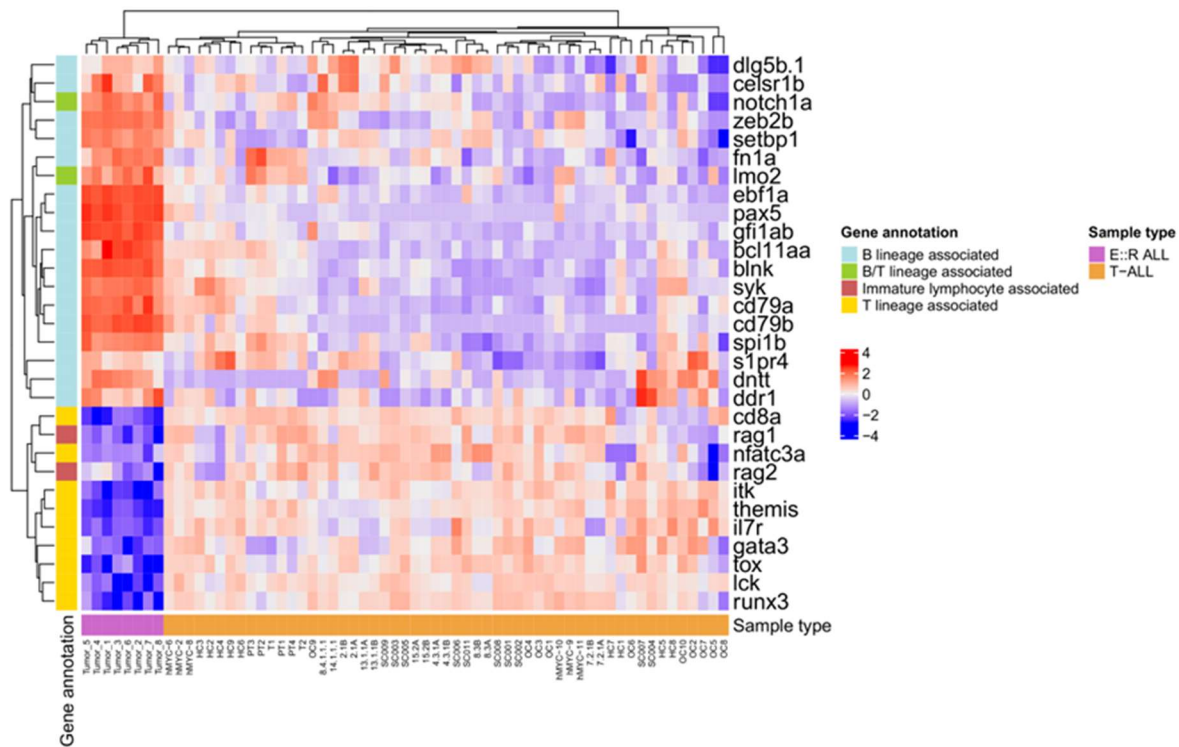

**Figure S14.** Heatmap visualizing the significantly differentially expressed (adjusted p-value  $\leq 0.05$ ) B and T lineage associated genes between the *E::R;pax5mut* ALL and T-ALL zebrafish transcriptomes, and their expression across the two different zebrafish leukemia types. *E::R;pax5mut* zebrafish leukemias express several B lineage associated genes at significantly higher levels compared to zebrafish with T-ALL, while the expression difference is the opposite for multiple T lineage associated genes.

**Table S1.** Oligos and templates used for the construction of the donor plasmid.

| Purpose                                                          | Sequence (5' -> 3')                                                                                                                  | Template                                                                            |
|------------------------------------------------------------------|--------------------------------------------------------------------------------------------------------------------------------------|-------------------------------------------------------------------------------------|
| Destroying <i>XbaI</i> site                                      | Top oligo: CTAGGTAGGGATAACAGGGTAATA                                                                                                  | -                                                                                   |
|                                                                  | Bottom oligo: AATTATTACCCTGTTATCCCTAC                                                                                                |                                                                                     |
| Insertion of <i>Clal-NotI-SacII-SpeI-P2A-XbaI-NcoI</i> -fragment | Top oligo:<br>GATCTATCGATGCGGCCGCGGACTAGTG<br>GAAGCGGAGCTACTAACTTCAGCCTGCTGAAG<br>CAGGCTGGAGACGTGGAGGAGAACCCTGGAC<br>CTTCTAGAC       | -                                                                                   |
|                                                                  | Bottom oligo:<br>CATGGTCTAGAAGGTCCAGGGTTCTCCTCCACG<br>TCTCCAGCCTGCTTCAGCAGGCTGAAGTTAGTA<br>GCTCCGCTTCCACTAGTCCGCGGGCGCCGCAT<br>CGATA |                                                                                     |
| Amplification of human <i>RUNX1</i> (exon 2-8)                   | Forward primer with <i>SacII</i> :<br>AGACCGCGGAATGCATACTTG                                                                          | <i>RUNX1</i> Human<br>Untagged Clone in<br><i>pCMV6-XL5</i> (Origene;<br>#SC123977) |
|                                                                  | Reverse primer with <i>SpeI</i> :<br>AGAACTAGTGTAGGGCTCCACAC                                                                         |                                                                                     |
| Amplification of carp b-actin intron 1<br>splice acceptor        | Forward primer with <i>SacII</i> :<br>AGACCGCGGCACCCACTAGCGGTC                                                                       | <i>pGBT-RP2-1</i>                                                                   |
|                                                                  | Reverse primer with <i>XbaI</i> :<br>AGATCTAGAAGGATTCATTCCAAGTATGCATTG<br>CGGCTGAAC TG                                               |                                                                                     |
| Amplification of GAL4-VP16                                       | Forward primer with <i>XbaI</i> :<br>AGAGAATTCGTTAAGCTACTGTCTTC                                                                      | <i>pME-Gal4VP16</i>                                                                 |
|                                                                  | Reverse primer with <i>NotI</i> :<br>AGAGCGGCCCGCCTACATATCCAGAGC                                                                     |                                                                                     |
| Amplification of TE                                              | Forward primer with <i>NotI</i> :<br>AGAGCGGCCCGCATTAAGTCTCAGCCAC                                                                    | <i>pGBT-RP2-1</i>                                                                   |
|                                                                  | Reverse Primer with <i>NcoI</i> :<br>AGACCATGGTCTGGTAGCTGTACAC                                                                       |                                                                                     |
| Insertion of 5' homology arm                                     | Oligo A:<br>GCGGCCCAACTGAAACAGGCCTGATATTAGAA<br>ACAATGTGGGCGGGGATTTCCTT                                                              | -                                                                                   |
|                                                                  | Oligo B:<br>ATCCAAGGAAATCCCCGCCACATTGTTTCTAA<br>TATCAGGCCTGTTTCAGTTGGG                                                               |                                                                                     |
| Insertion of 3' homology arm                                     | Oligo A:<br>AAGCTTTGGAAGCTGATTGGTTGAATGATGGG<br>GGTTAACAAAATGAGGGAACCC                                                               | -                                                                                   |
|                                                                  | Oligo B:<br>CGGGGGTTCCTCATTGTTGTTAACCCCATCATT<br>CAACCAATCAGCTTCCAAAG                                                                |                                                                                     |



**Table S2.** Targets of sgRNAs.

| Gene/plasmid<br>(GenBank number if applicable) | Target sequence (5'→3') | Strand  | Targeted exon/intron |
|------------------------------------------------|-------------------------|---------|----------------------|
| Donor plasmid                                  | GGGAGGCGTTCGGGCCACAG    | -       | -                    |
| <i>Etv6</i><br>(BC045451.1)                    | TGGGCGGGGATTCCTTCTT     | Forward | Intron 5             |
| <i>Pax5</i><br>(BX511134.8)                    | AGGCAAACATGGTGGGGTTT    | Reverse | Exon 3               |
|                                                | GATGGAGTAGGAGGAGCCTG    | Reverse | Exon 5               |
| <i>Cdkn2a/2b</i><br>(CT573245.20)              | GTGCTCCCTGTGTCGGGGTC    | Reverse | Exon 2               |
|                                                | GTTCTGGCAGCGTCGTGCAG    | Reverse | Exon 2               |
|                                                | GTGCGGCTTTTAATCCGCTT    | Forward | Exon 2               |

**Table S3.** Oligos for the generation of sgRNA templates.

| Oligo                                   | Sequence (5'→3')                                                                    |
|-----------------------------------------|-------------------------------------------------------------------------------------|
| sgRNA intron 5 <i>etv6</i>              | TAATACGACTCACTATAGGGCGGGGATTCCTTCTTGTTT<br>TAGAGCTAGAA                              |
| sgRNA <i>pax5</i> exon 3                | TAATACGACTCACTATAGGGCAAACATGGTGGGGTTTGTTT<br>TAGAGCTAGAA                            |
| sgRNA <i>pax5</i> exon 5                | TAATACGACTCACTATAGGTGGAGTAGGAGGAGCCTGGTT<br>TTAGAGCTAGAA                            |
| sgRNA <i>cdkn2a/2b</i> exon 2 #1        | TAATACGACTCACTATAGGGCTCCCTGTGTCGGGGTCGTTT<br>TAGAGCTAGAA                            |
| sgRNA <i>cdkn2a/2b</i> exon 2 #2        | TAATACGACTCACTATAGGTCTGGCAGCGTCGTGCAGGTTT<br>TAGAGCTAGAA                            |
| sgRNA <i>cdkn2a/2b</i> exon 2 #1        | TAATACGACTCACTATAGGGCGGCTTTTAATCCGCTTGTTT<br>TAGAGCTAGAA                            |
| Universal oligo with guide RNA sequence | GATCCGCACCGACTCGGTGCCACTTTTCAAGTTGATAAC<br>GGACTAGCCTTATTT AACTTGCTATTTCTAGCTCTAAAC |
| T7 primer                               | TAATACGACTCACTATA                                                                   |
| 3' sgRNA primer                         | GATCCGCACCGACTCGGTG                                                                 |

**Table S4.** Oligos used for T7 endonuclease I assays.

| Oligo                   | Sequence (5'→3')                    |
|-------------------------|-------------------------------------|
| Intron 5 of <i>etv6</i> | Forward: AGAGGATCCACAGACACTACCGCAAC |
|                         | Reverse: AGAAAGCTTGGTGGATCTATCAGTC  |
| <i>Pax5</i> exon 3      | Forward: GTCTCGTGATATTCAGCC TTC     |
|                         | Reverse: GAAGATGTGTTTTACACAC        |
| <i>Pax5</i> exon 5      | Forward: GTAGTCTTATAGTCTCTCTG       |
|                         | Reverse: CAAAGCATGCGCTGACTTAC       |
| <i>Cdkn2a/2b</i> exon 2 | Forward: AGAGGATCCGTGATGATGATGG     |
|                         | Reverse: AGAAAGCTTTTAAACACGATTG     |

**Table S5.** Oligos used to amplify the genomic region over the insertion site of the gene-breaking cassette or a piece of the *E::R* cDNA.

| Oligo                              | Sequence (5'→3')           |
|------------------------------------|----------------------------|
| Forward primer with <i>HindIII</i> | AGAAAGCTTCACATCAGCCTGCAG   |
| Reverse primer with <i>BamHI</i>   | AGAGGATCCCATTCCAAGTATGCATT |

**Table S6.** Significantly differentially expressed B and T lineage associated genes between the leukemic *E::R;pax5mut* and non-leukemic kidney marrow zebrafish transcriptomes and their adjusted p-values.

| Gene name      | Gene ID            | Classification            | P-value adjusted |
|----------------|--------------------|---------------------------|------------------|
| <i>syk</i>     | ENSDARG00000008186 | B cell gene               | 5,25E-04         |
| <i>fn1a</i>    | ENSDARG00000019815 | B cell gene               | 3,79E-03         |
| <i>pax5</i>    | ENSDARG00000037383 | B cell gene               | 7,09E-06         |
| <i>cd79a</i>   | ENSDARG00000037473 | B cell gene               | 0,02738069       |
| <i>dntt</i>    | ENSDARG00000038540 | B cell gene               | 4,37E-02         |
| <i>itga6a</i>  | ENSDARG00000042282 | B cell gene               | 7,84E-06         |
| <i>blnk</i>    | ENSDARG00000042722 | B cell gene               | 0,0000209        |
| <i>kita</i>    | ENSDARG00000043317 | B cell gene               | 3,02E-03         |
| <i>gfi1ab</i>  | ENSDARG00000044457 | B cell gene               | 3,03E-06         |
| <i>rag2</i>    | ENSDARG00000052121 | Immature lymphocyte gene  | 5,86E-03         |
| <i>celsr1b</i> | ENSDARG00000058259 | B cell gene               | 1,52E-02         |
| <i>s1pr4</i>   | ENSDARG00000074851 | B cell gene               | 7,18E-06         |
| <i>nfatc3a</i> | ENSDARG00000076297 | T cell gene               | 2,88E-03         |
| <i>zeb2b</i>   | ENSDARG00000078416 | B cell gene               | 6,43E-06         |
| <i>ddr1</i>    | ENSDARG00000078523 | B cell gene               | 1,04E-05         |
| <i>dlg5b.1</i> | ENSDARG00000090949 | B cell gene               | 1,16E-03         |
| <i>setbp1</i>  | ENSDARG00000093799 | B cell gene               | 5,38E-06         |
| <i>ebf1a</i>   | ENSDARG00000099849 | B cell gene               | 9,54E-07         |
| <i>notch1a</i> | ENSDARG00000103554 | B cell gene / T cell gene | 0,00350796       |
| <i>cd79b</i>   | ENSDARG00000104691 | B cell gene               | 1,65E-04         |

**Table S7.** Significantly differentially expressed B and T lineage associated genes between *E::R* ALL, B-ALL, biphenotypic ALL, and T-ALL zebrafish transcriptomes and their adjusted p-values.

| Gene name | Gene ID            | Classification            | P-value adjusted |
|-----------|--------------------|---------------------------|------------------|
| spi1b     | ENSDARG00000000767 | B cell gene               | 1,10E-22         |
| syk       | ENSDARG00000008186 | B cell gene               | 4,24E-25         |
| themis    | ENSDARG00000010619 | T cell gene               | 6,84E-21         |
| rasl11b   | ENSDARG00000015611 | B cell gene               | 0,020750432      |
| gata3     | ENSDARG00000016526 | T cell gene               | 9,08E-15         |
| itk       | ENSDARG00000017565 | T cell gene               | 5,82E-23         |
| fn1a      | ENSDARG00000019815 | B cell gene               | 0,000241907      |
| tox       | ENSDARG00000032317 | T cell gene               | 1,81E-16         |
| pax5      | ENSDARG00000037383 | B cell gene               | 1,94E-50         |
| cd79a     | ENSDARG00000037473 | B cell gene               | 2,15E-29         |
| dntt      | ENSDARG00000038540 | B cell gene               | 2,08E-10         |
| blnk      | ENSDARG00000042722 | B cell gene               | 2,63E-34         |
| gfi1ab    | ENSDARG00000044457 | B cell gene               | 5,02E-36         |
| cd8a      | ENSDARG00000044797 | T cell gene               | 1,11E-14         |
| rag1      | ENSDARG00000052122 | Immature lymphocyte gene  | 1,66E-13         |
| runx3     | ENSDARG00000052826 | T cell gene               | 2,86E-26         |
| celsr1b   | ENSDARG00000058259 | B cell gene               | 1,96E-08         |
| bcl11aa   | ENSDARG00000061352 | B cell gene               | 3,48E-30         |
| s1pr4     | ENSDARG00000074851 | B cell gene               | 0,007295373      |
| nfatc3a   | ENSDARG00000076297 | T cell gene               | 7,09E-06         |
| zeb2b     | ENSDARG00000078416 | B cell gene               | 1,73E-33         |
| ddr1      | ENSDARG00000078523 | B cell gene               | 0,020719094      |
| il7r      | ENSDARG00000078970 | T cell gene               | 4,15E-12         |
| dlg5b.1   | ENSDARG00000090949 | B cell gene               | 1,21E-07         |
| setbp1    | ENSDARG00000093799 | B cell gene               | 1,20E-17         |
| lmo2      | ENSDARG00000095019 | B cell gene / T cell gene | 7,33E-19         |
| ebf1a     | ENSDARG00000099849 | B cell gene               | 7,40E-42         |
| lck       | ENSDARG00000102525 | T cell gene               | 3,13E-34         |
| notch1a   | ENSDARG00000103554 | B cell gene / T cell gene | 1,23E-16         |
| cd79b     | ENSDARG00000104691 | B cell gene               | 1,55E-42         |

**Table S8.** Significantly differentially expressed B and T lineage associated genes between *E::R* ALL and T-ALL zebrafish transcriptomes and their adjusted p-values.

| Gene name | Gene ID            | Classification            | P-value adjusted |
|-----------|--------------------|---------------------------|------------------|
| spi1b     | ENSDARG00000000767 | B cell gene               | 1,99E-18         |
| syk       | ENSDARG00000008186 | B cell gene               | 9,10E-20         |
| themis    | ENSDARG00000010619 | T cell gene               | 2,67E-15         |
| gata3     | ENSDARG00000016526 | T cell gene               | 2,65E-10         |
| itk       | ENSDARG00000017565 | T cell gene               | 5,39E-18         |
| fn1a      | ENSDARG00000019815 | B cell gene               | 6,54E-12         |
| tox       | ENSDARG00000032317 | T cell gene               | 2,07E-11         |
| pax5      | ENSDARG00000037383 | B cell gene               | 1,56E-44         |
| cd79a     | ENSDARG00000037473 | B cell gene               | 1,90E-25         |
| dntt      | ENSDARG00000038540 | B cell gene               | 3,77E-10         |
| blnk      | ENSDARG00000042722 | B cell gene               | 6,44E-34         |
| gf1lab    | ENSDARG00000044457 | B cell gene               | 1,01E-49         |
| cd8a      | ENSDARG00000044797 | T cell gene               | 6,55E-10         |
| rag2      | ENSDARG00000052121 | Immature lymphocyte gene  | 0,000165878      |
| rag1      | ENSDARG00000052122 | Immature lymphocyte gene  | 3,59E-14         |
| runx3     | ENSDARG00000052826 | T cell gene               | 6,53E-19         |
| celsr1b   | ENSDARG00000058259 | B cell gene               | 0,000175481      |
| bcl11aa   | ENSDARG00000061352 | B cell gene               | 5,57E-24         |
| s1pr4     | ENSDARG00000074851 | B cell gene               | 0,018002305      |
| nfatc3a   | ENSDARG00000076297 | T cell gene               | 0,000202727      |
| zeb2b     | ENSDARG00000078416 | B cell gene               | 5,67E-28         |
| ddr1      | ENSDARG00000078523 | B cell gene               | 0,001689668      |
| il7r      | ENSDARG00000078970 | T cell gene               | 8,95E-09         |
| dlg5b.1   | ENSDARG00000090949 | B cell gene               | 0,011998089      |
| setbp1    | ENSDARG00000093799 | B cell gene               | 6,23E-12         |
| lmo2      | ENSDARG00000095019 | B cell gene / T cell gene | 1,52E-13         |
| ebf1a     | ENSDARG00000099849 | B cell gene               | 3,73E-42         |
| lck       | ENSDARG00000102525 | T cell gene               | 4,57E-26         |
| notch1a   | ENSDARG00000103554 | B cell gene / T cell gene | 4,02E-16         |
| cd79b     | ENSDARG00000104691 | B cell gene               | 4,12E-36         |



**Table S9.** Enriched KEGG pathways in *E::R;pax5*mut tumors (adjusted p-value  $\leq 0.05$ ). NumDEInCat: number of differential expressed genes in category; NumInCat: number of genes in category.

| KEGG pathway (ID)                                 | NumDEInCat | NumInCat | P-value adjusted |
|---------------------------------------------------|------------|----------|------------------|
| Spliceosome (03040)                               | 96         | 126      | 2.5116e-11       |
| Homologous recombination (03440)                  | 21         | 24       | 0.0021           |
| DNA replication (03030)                           | 29         | 37       | 0.0021           |
| Nucleotide excision repair (03420)                | 31         | 42       | 0.0059           |
| Glycine, serine, and threonine metabolism (00260) | 24         | 31       | 0.0118           |
| ECM-receptor interaction (04512)                  | 42         | 59       | 0.0150           |
| Citrate cycle (00020)                             | 25         | 33       | 0.0167           |
| Mismatch repair (03430)                           | 17         | 21       | 0.0198           |
| Cell cycle (04110)                                | 75         | 123      | 0.0205           |
| Tryptophan metabolism (00380)                     | 28         | 40       | 0.0305           |
| Lysine degradation (00310)                        | 30         | 43       | 0.0310           |
| Pyrimidine metabolism (00240)                     | 53         | 90       | 0.0310           |
| Non-homologous end-joining (03450)                | 12         | 14       | 0.0310           |
| RNA degradation (03018)                           | 44         | 70       | 0.0310           |
| Base excision repair (03410)                      | 24         | 34       | 0.0310           |
| Fatty acid degradation (00071)                    | 26         | 37       | 0.0431           |
| Metabolic pathways (01100)                        | 492        | 989      | 0.0451           |
| Histidine metabolism (00340)                      | 17         | 23       | 0.0470           |

**Table S10.** Oligos used to amplify a piece of the *etv6* intron 5 via PCR.

| Oligo                               | Sequence (5'→3')           |
|-------------------------------------|----------------------------|
| Forward primer with <i>Bam</i> HI   | AGAGGATCCACAGACACTACCGCAAC |
| Reverse primer with <i>Hind</i> III | AGAAAGCTTGGTGGATCTATCAGTC  |
