# Supplementary figures and images for: Generation of a Zebrafish Knock-In Model Recapitulating Childhood ETV6::RUNX1-Positive B-Cell Precursor Acute Lymphoblastic Leukemia
Source: MDPI journal article supplement (doi:10.3390/cancers15245821), 2023-12-13

Figure 3d original blot.

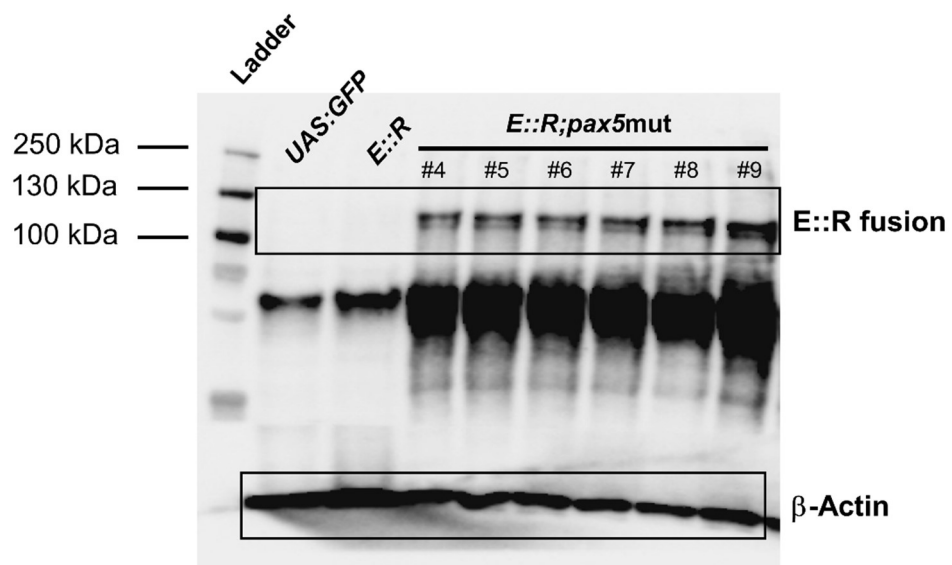

Supplement: s1 [file s1]
